# Supplementary material
Source: PubMed Central journal article supplement (PMC9070834)
Supplement: kiac059_supplementary_data.pdf [file kiac059_supplementary_data.pdf]

A

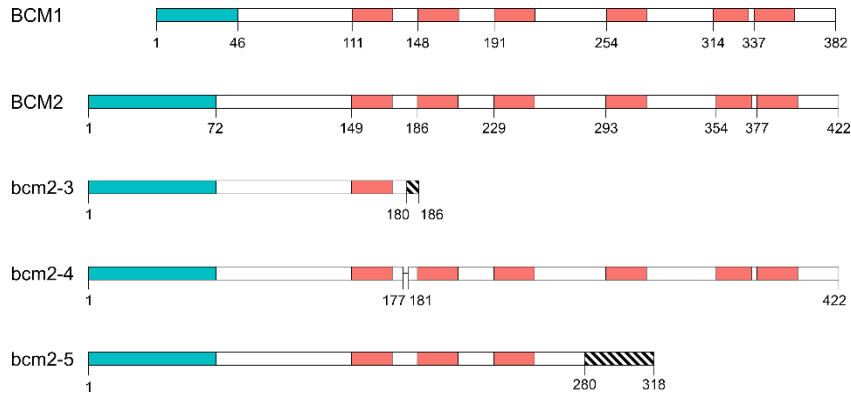

B

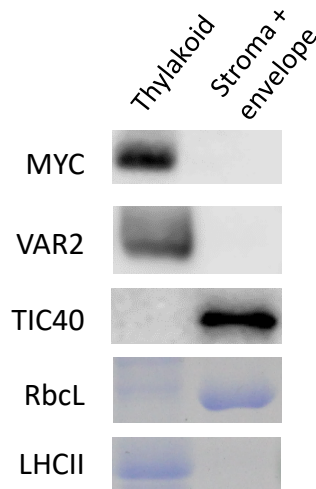

**Supplemental Figure S1.** Protein structures and subcellular localization of BCM1 and 2. A, Predicted protein structures of the BCMs and their mutants. 'Blue' and 'red' regions represent plastid transit peptides and transmembrane regions, respectively. Hatched regions indicate regions in which frameshifts occurred. *bcm2-4* contains a deletion corresponding to the 178-180th amino acid region. B, Subcellular fractionation of the BCM1-4 × MYC protein in *bcm1-3 bcm2-3* plants. 'MYC' indicates the results of Western blot analysis of BCM1 using anti-MYC antibody. VAR2 and TIC40 were used as references for thylakoid and inner envelope localization. RbcL and LHCII were visualized by SDS-PAGE gel staining with Coomassie Brilliant Blue.

A

|               |        |                                                         |
|---------------|--------|---------------------------------------------------------|
| <i>BCM2</i>   | 523 bp | GCA GGA ATA GAT TAC ACA GGA GGT TTT AAT GCT TCT TTA GAT |
|               | 175 aa | A G I D Y T G G F N A S L D                             |
| <i>bcm2-3</i> | 523 bp | GCA GGA ATA GAT TAC A-AG GAG GTT TTA ATG CTT CTT TAG AT |
|               | 175 aa | A G I D Y K E V L M L L *                               |
| <i>bcm2-4</i> | 523 bp | GCA GGA ATA --- --- --- GGA GGT TTT AAT GCT TCT TTA GAT |
|               | 175 aa | A G I - - - G G F N A S L D                             |
| <i>BCM2</i>   | 825 bp | TCT CGA GGA ATG GTT GCT TTG ACT GGA CTC TTG CCA CCA TTT |
|               | 279 aa | S R G M V A L T G L L P P F                             |
|               | 877 bp | GTA CCA TTT GCT CAA GTA TTT GCA GCC ACT ATT ACA GCC GCT |
|               | 293 aa | V P F A Q V F A A T I T A A                             |
|               | 919 bp | CTC ACT GGT TCT CTC TAC TAC ATA GCT GCT TCC CCT AAA GAT |
|               | 307 aa | L T G S L Y Y I A A S P K D                             |
| <i>bcm2-5</i> | 825 bp | TCA TCG AGG AAT GGT TGC TTT GAC TGG ACT CTT GCC ACC ATT |
|               | 279 aa | S S R N G C F D W T L A T I                             |
|               | 877 bp | TGT ACC ATT TGC TCA AGT ATT TGC AGC CAC TAT TAC AGC CGC |
|               | 293 aa | C T I C S S I C S H Y Y S R                             |
|               | 919 bp | TCT CAC TGG TTC TCT CTA CTA CAT AGC TGC TTC CCC TAA AGA |
|               | 307 aa | S H W F S L L H S C F P *                               |

B

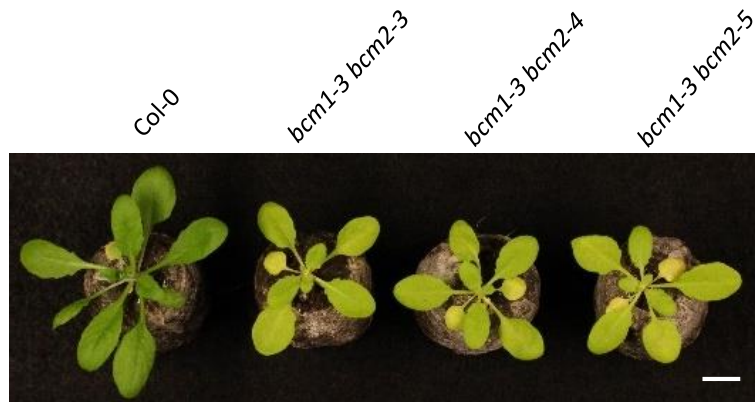

**Supplemental Figure S2.** Mutations and phenotypes of the *bcm* mutants. A, Alignment of *bcm2-3*, *bcm2-4*, and *bcm2-5* genes / proteins. *bcm2-3* and *bcm2-5* contain a 1-bp deletion and 1-bp insertion, respectively, resulting in frameshifts and the generation of premature stop codons. *bcm2-4* contains a 9-bp deletion, resulting in a three-amino-acid deletion. Nucleotide mutations are shown in red. B, Phenotypes of the *bcm1 bcm2* double mutants. Plants were grown at 22°C for 23 days under long-day conditions. Scale bar: 1 cm.

A

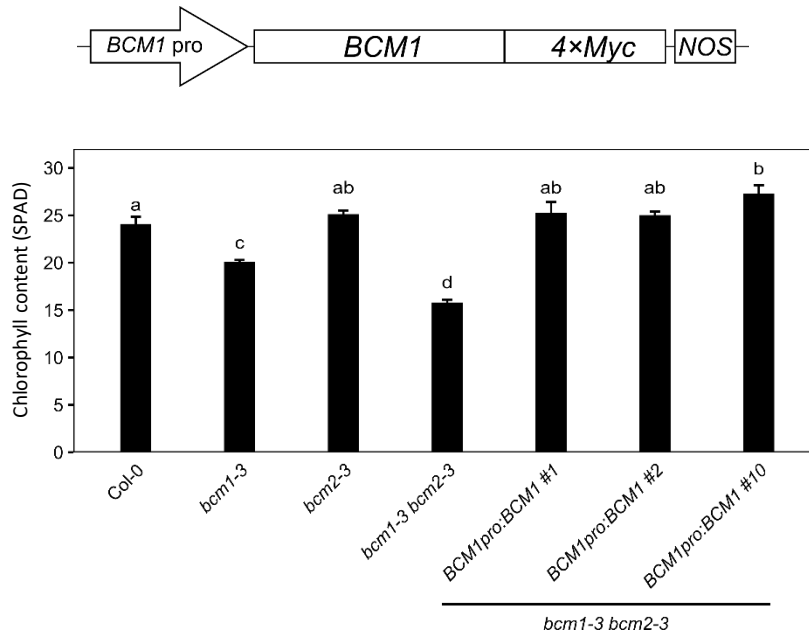

B

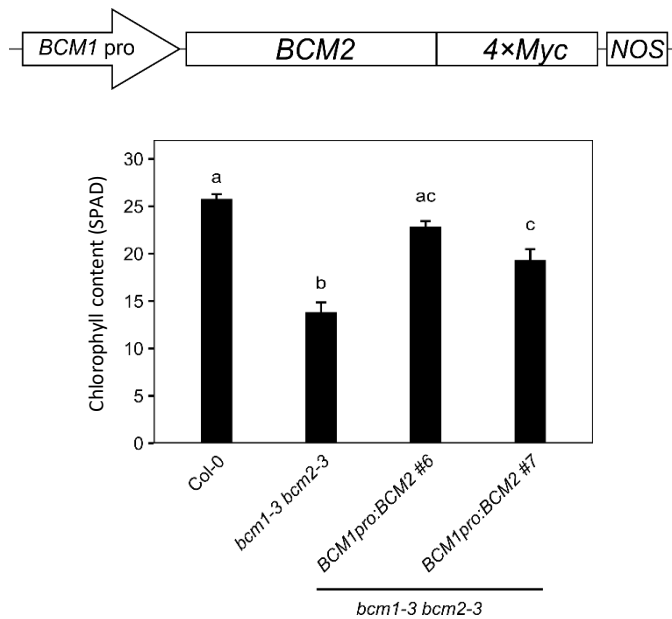

**Supplemental Figure S3.** Complementation of the *bcm1 bcm2* phenotype by *BCM1* and *BCM2*. The low chlorophyll content phenotype of *bcm1-3 bcm2-3* was complemented by *BCM1*-promoter-driven *BCM1* (A) and *BCM2* (B) transgenes. Data were statistically analyzed using Tukey's multiple comparison method ( $p < 0.05$ ). Error bars indicate standard errors ( $n = 4$ ).

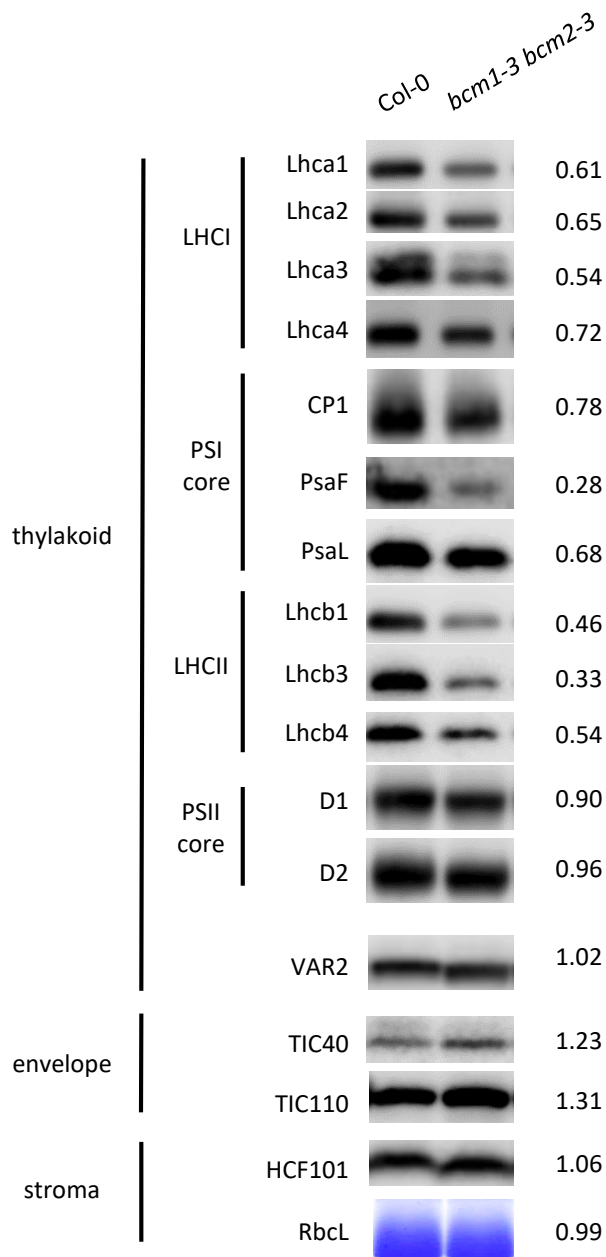

**Supplemental Figure S4.** Western blot analysis of chloroplast proteins in presenescent leaves of *bcm1 bcm2*. Proteins were extracted from the same fresh weight of pre-senescent leaves and subjected to SDS-PAGE analysis followed by Western blot analysis. RbcL was visualized by SDS-PAGE gel staining with Coomassie Brilliant Blue. Values shown to the right of the panel indicate relative band intensities (*bcm1-3 bcm2-3* / Col-0).

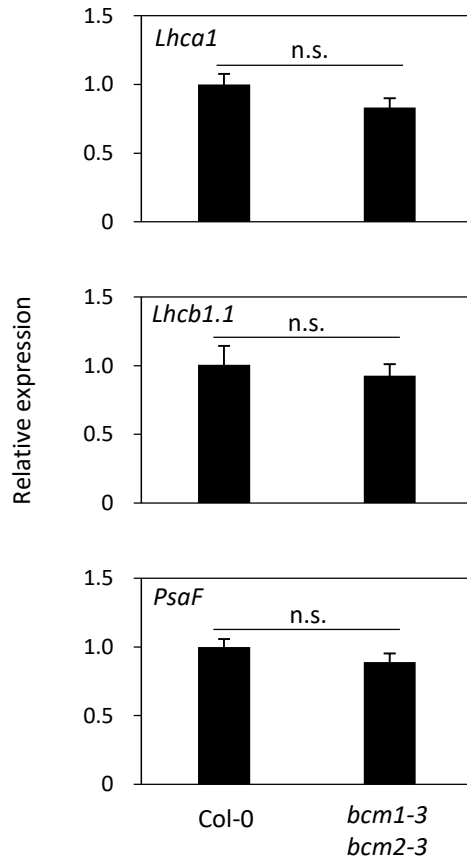

**Supplemental Figure S5.** Expression of photosynthesis-related genes in presenescent leaves of *bcm1 bcm2*. RT-qPCR analysis of photosystem-related genes was performed using *bcm1-3 bcm2-3* pre-senescent leaves. Error bars indicate standard errors (n = 4). 'n.s.': not significant (Student's t test).

A

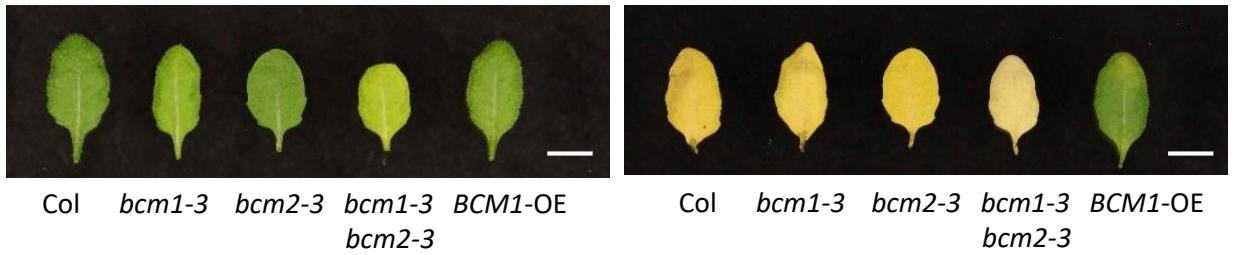

B

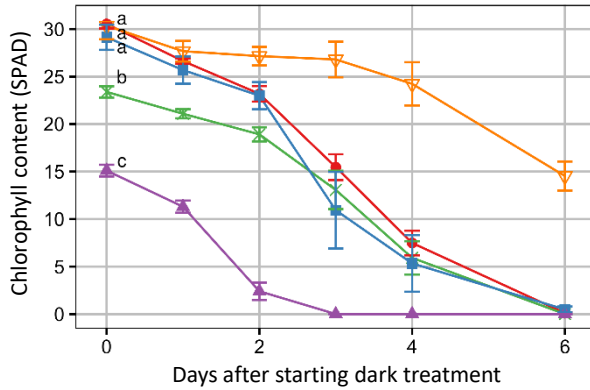

C

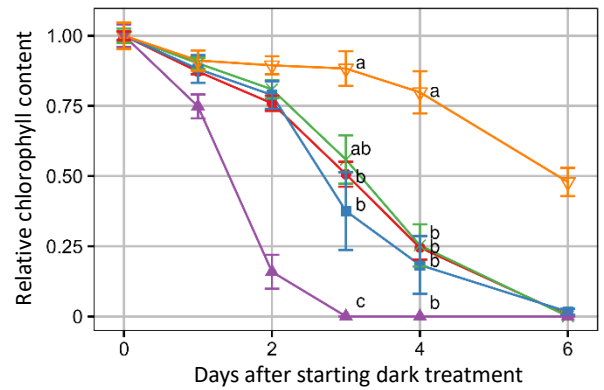

D

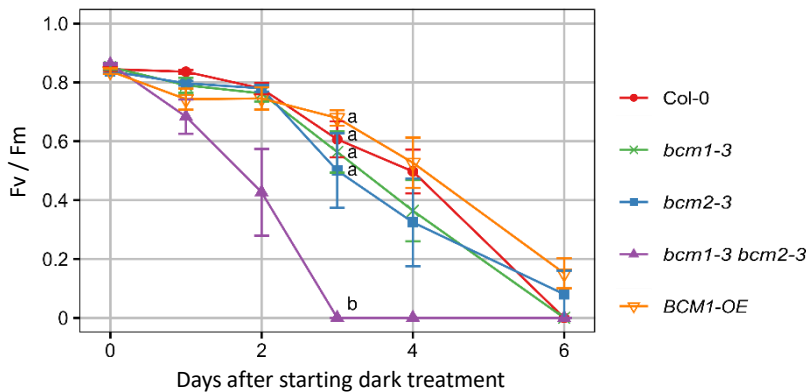

**Supplemental Figure S6.** Chlorophyll degradation in *bcm* mutants and *BCM1* overexpressing plants during leaf senescence. A, Leaves of *bcm* mutants and BCM-OE plants before (left) and (right) six days after starting dark incubation. Seventh leaves of 28-day-old plants grown at 22°C under short-day conditions were detached and incubated in the dark at 22°C. Scale bar: 1cm. B and C, Changes in chlorophyll content with time during dark incubation. B and C indicate SPAD values and relative values to pre-senescent leaves. D, Changes in  $F_v / F_m$  values with time during dark incubation. Detached leaves were incubated at 22°C in the dark. SPAD value is non-destructive chlorophyll measurement. Data were statistically analyzed using Tukey's multiple comparison method ( $p < 0.05$ ). Error bars indicate standard errors ( $n = 4$ ).

A

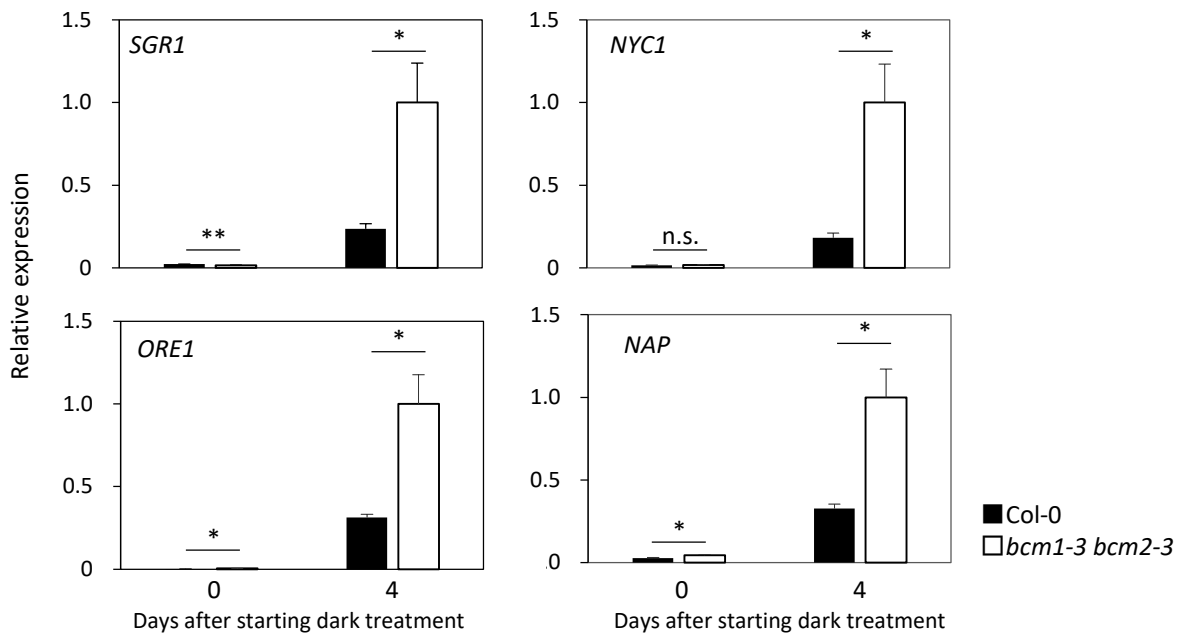

B

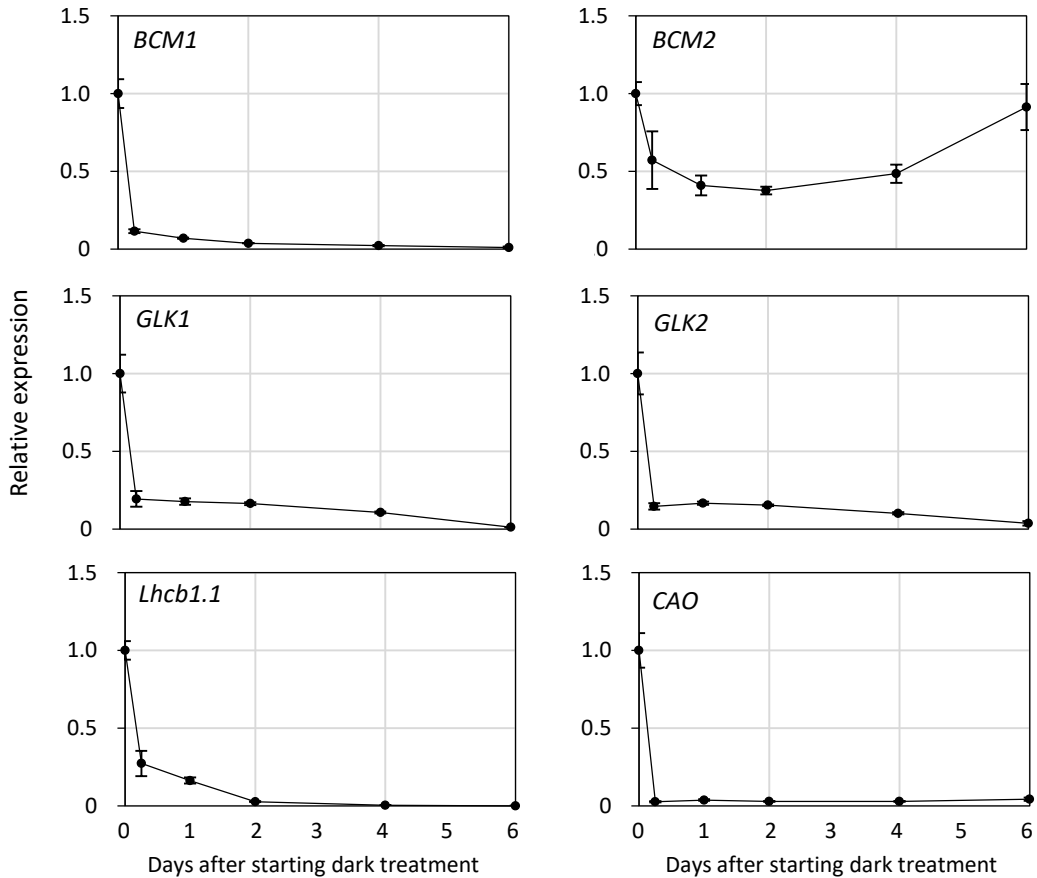

**Supplemental Figure S7.** Expression of senescence- and photosynthesis-related genes during dark incubation. A, RT-qPCR analysis of senescence-inducible genes in *bcm1 bcm2* before and four days after starting dark incubation. Eighth leaves of 25-day-old plants grown at 22°C under short-day conditions were detached and incubated in the dark at 22°C. B, Changes in expression of *BCMs*, *GLKs* and *GLK*-targeted genes with time during dark incubation. Error bars indicate standard errors (n=4 in A, n=5 in B). \* p < 0.05. 'n.s.': not significant (Student's t test).

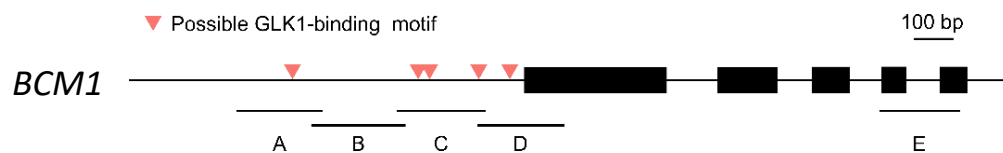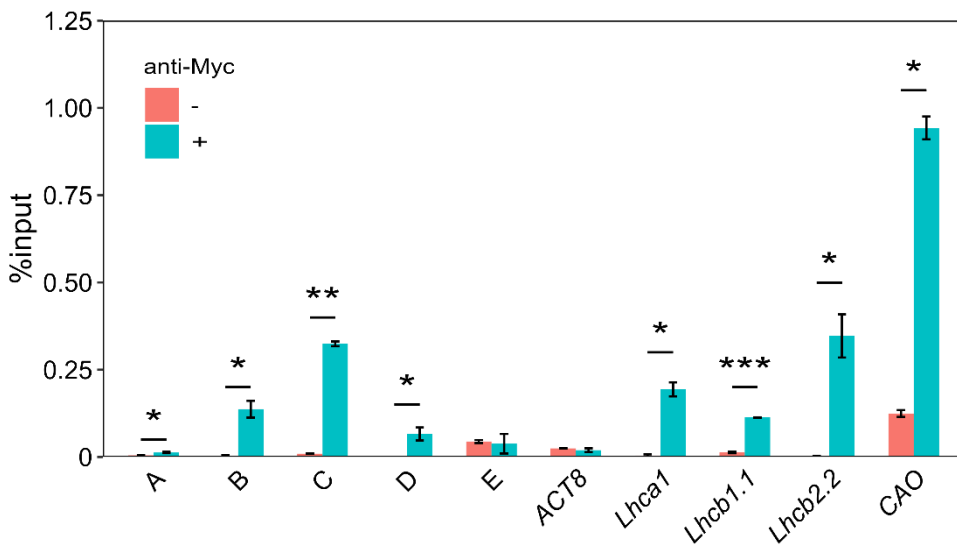

**Supplemental Figure S8.** ChIP-qPCR analysis of GLK1 binding to the *BCM1* promoter. ChIP-qPCR analysis was performed as described in Fig.3. Fold enrichment is indicated as the % input. \*\* and \*\*\*  $p < 0.01$  and  $p < 0.001$ , respectively (Student's t test). Error bars indicate standard errors (n=3).



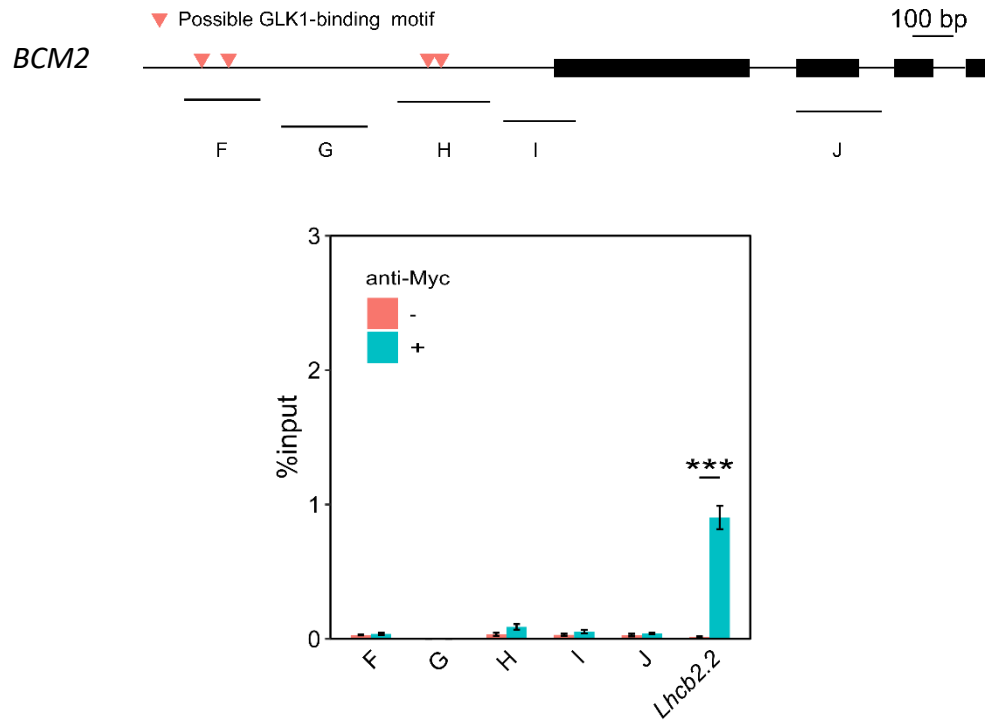

**Supplemental Figure S9.** ChIP-qPCR analysis of GLK1 binding to the *BCM2* promoter. ChIP-qPCR analysis of GLK1 binding to the *BCM2* promoter was performed using GLK1-4 × MYC overexpressing plants. The upper panel shows the gene structure of *BCM1*. Red triangles indicate the positions of possible GLK1-binding sequences. Black boxes represent exons. F-J represent DNA regions used in ChIP-qPCR analysis. The lower panel shows the results of ChIP-qPCR analysis. Fold enrichment is indicated as the % input. \*\*\* indicate p < 0.001 (Student's t test). Error bars indicate standard errors (n = 4).

A

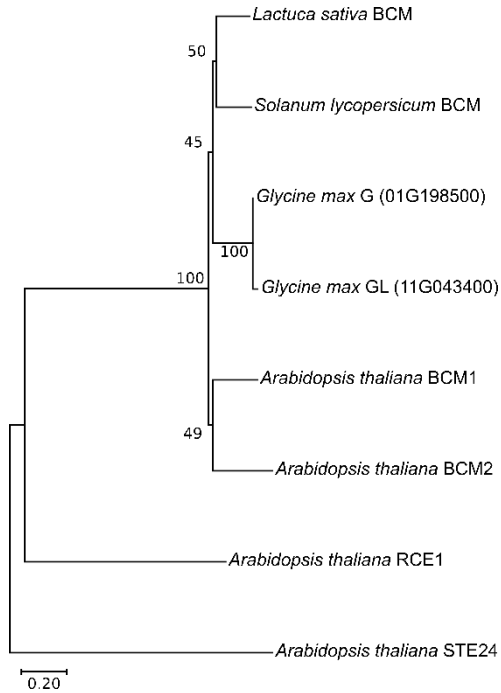

B

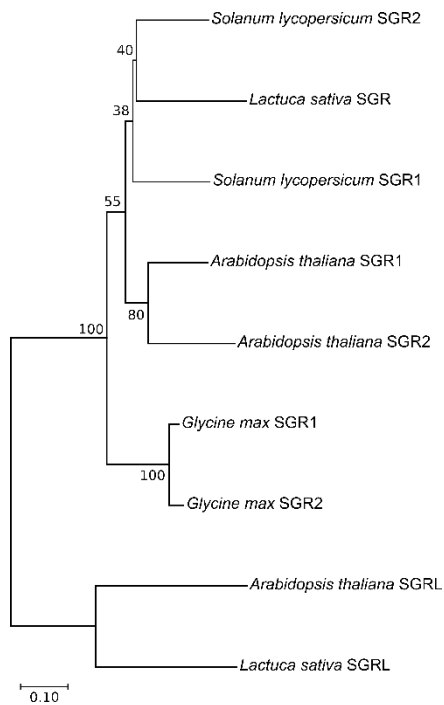

C

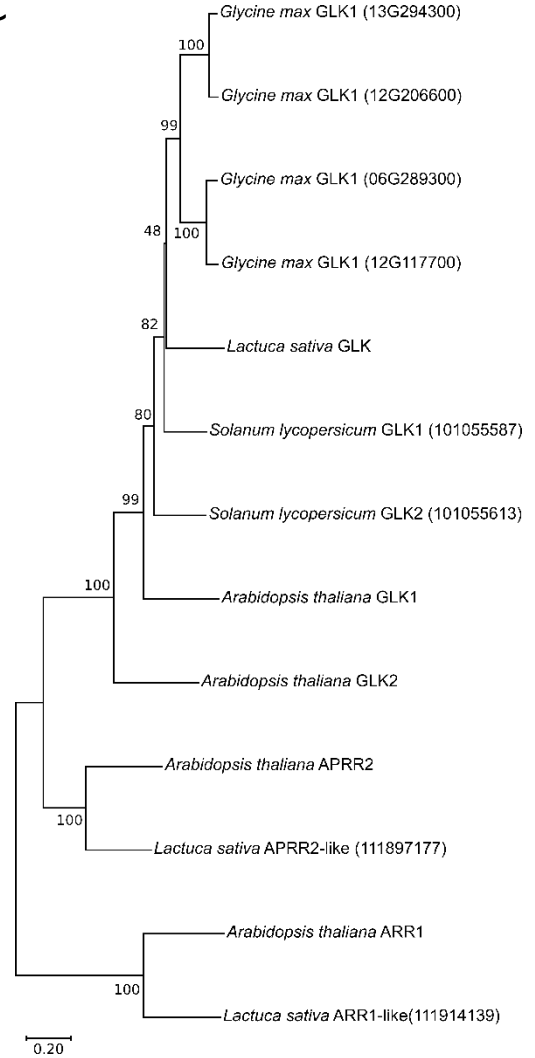

**Supplemental Figure S10.** Neighbor-joining trees of BCM, SGR, and GLK families. A, A phylogenetic tree of the BCM family. B, A phylogenetic tree of the SGR family. C, A phylogenetic tree of the GLK family. RCE1 and STE24 in *Arabidopsis* (A), SGRLs in *Arabidopsis* and lettuce (B), and APRR2s and ARR1s in *Arabidopsis* and lettuce (C) were used as outgroups, respectively. Bars indicate genetic distances (the number of amino acid substitutions per site). Numbers above branches indicate bootstrap values from 1000 bootstrap analyses.

*L. sativa* BCM1 -----MEFPMVLRAPT---TNPTF---TAYC---CSRGSVWLPER---LKKR 38  
*A. thaliana* BCM1 -----MELPLLSYASS---ASFSPGLCSSSS---SSTSIYEFPFRRRS-LKLI 43  
*A. thaliana* BCM2 -----MGLPLLSCSSTRVTLSSSSSSWCSGSGGFRSSKLFDSFACRSDLKKS 52  
*G. max* G -----MELLSLR---LTPSPS---SITSS---LPAALAHCSKCEP-QPRK 37  
*G. max* GL MLHVPITVSAISEQRQILNLFCCFSVLLVLMELLSLR---LTPSPS---ASITSS---LPAALAHCSKCEP-QPRK 69  
*S. lycopersicum* BCM -----MEFPLIARC---TNTPS---TPLG---CKVSLCDFPIRNNY-RDKN 39

*L. sativa* BCM1 YVSLKRAISVRAIVDNGGEGI-DTGERKSAVACGGGSVG-----AS-YTSSALVTFN 91  
*A. thaliana* BCM1 FNGGERSRSVITSAEISS---EGTEKITDITVGGGGGG-----AGRFAAGTAMVTFNLD 93  
*A. thaliana* BCM2 CKRNSRLNGLSIEKLSIKASSSSAGQSSEVDDCDAARGLAVTSGDVTSVGFSSSEVVGAGSGGLACSPCIVSVG 132  
*G. max* G XKACFDAPRFAARCVFA-----SAQRIGDTIDGGEAR-----SG-FITPAMVTFN 83  
*G. max* GL KKVCFDAPRFAARCVFA-----SAQRIGDTIDGGEAR-----TG-FITPAMVTFN 115  
*S. lycopersicum* BCM YNEKFSVVRKIMAEISS---STGEASSVEIREGNGG-----VG-FITGSTMVTFN 87

*L. sativa* BCM1 --QTFFD-AEFPVWDLIGAVVILSYGIGIIGAMAFVGNITCSITGITSTGGSPSLTALIVEGLGVAAPPIMALLTILDD 168  
*A. thaliana* BCM1 RGFANSTTVDFPIWDLIGAVVILSYGIGIIGAMAVAGRIICSVTGTSSGCDPSTLALLAGLIGVATPPIMALLTILDD 173  
*A. thaliana* BCM2 EFGVGGG-GDFKDWDLIGAVVILSYGIGIIGAMAVAGRIICVAGIIVTGGNASTLITLIGLIGVATPPIMALLTILDD 211  
*G. max* G R-STFSDADDFPVWDLIGAVVILSYGIGIIGAMAVAGSITCSITGITSLGGHLSLALILEGLGVAAPPIMALLTILDD 162  
*G. max* GL R-TTFDADDFPVWDLIGAVVILSYGIGIIGAMAVAGSITCSITGITSLGGHLSLALILEGLGVAAPPIMALLTILDD 194  
*S. lycopersicum* BCM --QSFSD-AQLPVWDLIGAVVILSYGIGIIGAMALAGRIICISISGITCTGGSPSLTALIVEGLGVAAPPIMALLTILDD 164

*L. sativa* BCM1 VVILGFAAAIIVDDELRSEFYGMSFQDFILVAASSVGLFVAAVGGALADIVLGNLDVNAHEMAALGVLP 248  
*A. thaliana* BCM1 VVILGFAAAIIVDDELRSEFYGMSFQDFILVAASSVGLFVAAVGGALADIVLGNLDVNAHEMAALGVLP 253  
*A. thaliana* BCM2 VVILGFAAAIIVDDELRSEFYGMSFQDFILVAASSVGLFVAAVGGALADIVLGNLDVNAHEMAALGVLP 291  
*G. max* G VVILGFAAAIIVDDELRSEFYGMSFQDFILVAASSVGLFVAAVGGALADIVLGNLDVNAHEMAALGVLP 242  
*G. max* GL VVILGFAAAIIVDDELRSEFYGMSFQDFILVAASSVGLFVAAVGGALADIVLGNLDVNAHEMAALGVLP 274  
*S. lycopersicum* BCM VVILGFAAAIIVDDELRSEFYGMSFQDFILVAASSVGLFVAAVGGALADIVLGNLDVNAHEMAALGVLP 244

*L. sativa* BCM1 FVPEAQAAAVITLALIGSLYVAAAPDPTVYVAVPILSSCQQLRFAAWYFRRQMKYISPLLGILLALVIGF 328  
*A. thaliana* BCM1 FVPEAQAAAVITLALIGSLYVAAAPDPTVYVAVPILSSCQQLRFAAWYFRRQMKYISPLLGILLALVIGF 331  
*A. thaliana* BCM2 FVPEAQAAAVITLALIGSLYVAAAPDPTVYVAVPILSSCQQLRFAAWYFRRQMKYISPLLGILLALVIGF 371  
*G. max* G FVPEAQAAAVITLALIGSLYVAAAPDPTVYVAVPILSSCQQLRFAAWYFRRQMKYISPLLGILLALVIGF 322  
*G. max* GL FVPEAQAAAVITLALIGSLYVAAAPDPTVYVAVPILSSCQQLRFAAWYFRRQMKYISPLLGILLALVIGF 354  
*S. lycopersicum* BCM FVPEAQAAAVITLALIGSLYVAAAPDPTVYVAVPILSSCQQLRFAAWYFRRQMKYISPLLGILLALVIGF 324

*L. sativa* BCM1 NGINLLAPIITGIGYATLLGHGLWTHDERRLLHCYQQNLDKNSRNF 380  
*A. thaliana* BCM1 VQINDLAPMHTGIGYAVLLGHGLWTHDERRLLRERHRSATDKLI- 382  
*A. thaliana* BCM2 IQINLLAPIITGIGYAVLLGHGLWTHDQQQLLISQKLEITGDNSR- 422  
*G. max* G IQINDLAPIITGIGYAVLLGHGLWTHDERRLLHCYQQKSKPKNSN- 372  
*G. max* GL IQINDLAPITGIGYAVLLGHGLWTHDERRLLHCYQQKSKPKNSN- 404  
*S. lycopersicum* BCM IQINLLAPIITGIGYAVLLGHGLWTHDERRLLHCYQQKSKPKNSNL 376

Color Align Properties results G, A, V, L, I E, Y, W C, M S, G K, R, L D, F N, Q P

**Supplemental Figure S11.** Amino acid sequence alignment of BCM proteins in lettuce, Arabidopsis, soybean and tomato. Triangles and bars indicate predicted cleavage sites of transit peptides and transmembrane regions, respectively. Amino acid residues with similar properties are indicated by the same color.

A

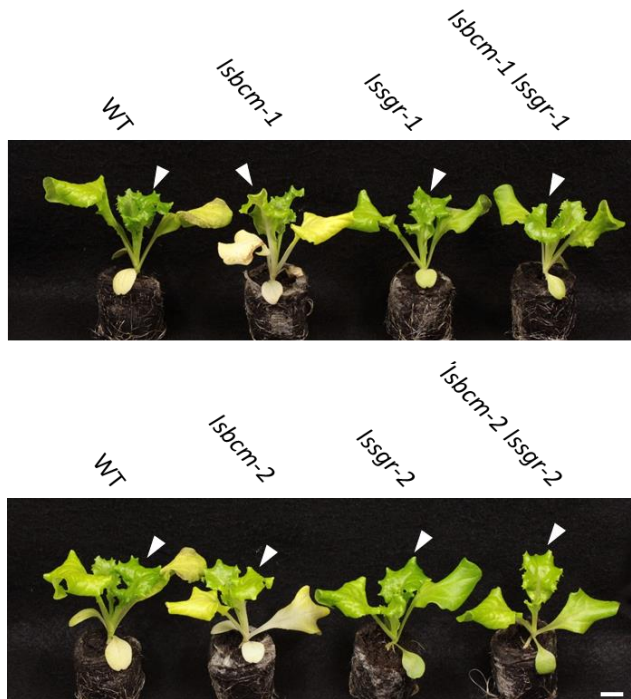

B

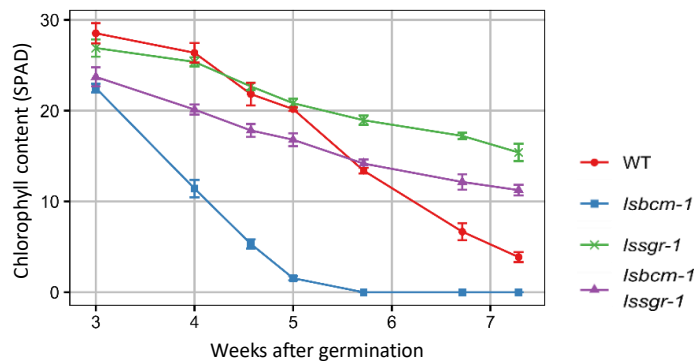

**Supplemental Figure S12.** Natural senescence of *Isbcm*, *Issgr*, and *Isbcm Issgr* mutants in lettuce. A, Four-week-old lettuce mutant plants. Scale bar: 1cm. B, Changes in chlorophyll contents of the *Isbcm*, *Issgr*, and *Isbcm Issgr* mutants with time until eight weeks after germination. The third true leaves indicated by an arrowhead in (A) were used for measurement of SPAD values. SPAD value is non-destructive chlorophyll measurement. Error bars indicate standard errors (n = 4).

A

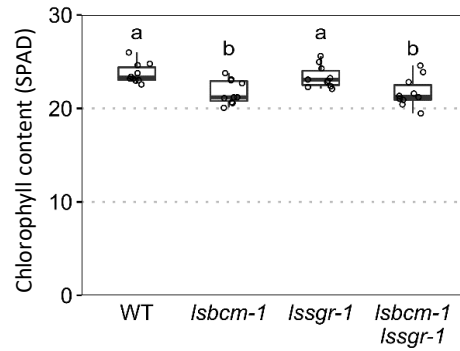

B

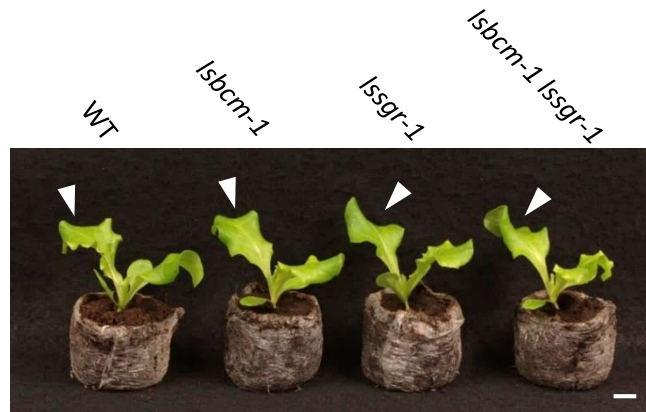

**Supplemental Figure S13.** Characterization of *lsbcm* and *lssgr* mutants. A, Box plot of the chlorophyll contents of pre-senescent leaves of the *lsbcm* and *lssgr* mutants. Median and first and third quartiles are shown. Whiskers represent the minimum and maximum values. Data were statistically analyzed using Tukey's multiple comparison method ( $p < 0.05$ ) ( $n = 10$ ). B, Phenotypes of two-week-old lettuce mutants used in (A). Chlorophyll contents of the second true leaves indicated by arrowheads were measured. Scale bar: 1cm. SPAD value is non-destructive chlorophyll measurement.

**Supplemental Table S1.** Primers used in genome editing and qPCR

| Purpose of use        | Primer Name             | Sequence (5' to 3')           |
|-----------------------|-------------------------|-------------------------------|
| gRNA (Arabidopsis)    | BCM2_gRNA1_F            | GATTGCAGGAATAGATTACACAGG      |
|                       | BCM2_gRNA1_R            | AAACCCGTGTGAATCTATTCTCTGC     |
|                       | BCM2_gRNA2_F            | ATTGGATCTTATCTCGGATTCTCG      |
|                       | BCM2_gRNA2_R            | AAACCGAGAATCCGAGATAAGATC      |
| gRNA (lettuce)        | LsBCM_gRNA1_F           | ATTGAGCGCTGTCGCTGGCGGCGG      |
|                       | LsBCM_gRNA1_R           | AAACCCGCCGCCAGCGACAGCGCT      |
|                       | LsBCM_gRNA2_F           | ATTGACAGGAATCGATAGCACAGG      |
|                       | LsBCM_gRNA2_R           | AAACCCGTGTCTATCGATTCTCTGT     |
|                       | LsSGR_gRNA1_F           | AAACTCCATCGTCTTCGTTTCTAC      |
|                       | LsSGR_gRNA1_R           | ATTGGTAGAAACGAAGACGATGGA      |
|                       | LsSGR_gRNA2_F           | ATTGGTTGACGAGAAGAAGCATCC      |
| LsSGR_gRNA2_R         | AAACGGATGCTTCTCTCGTCAAC |                               |
| RT-qPCR (Arabidopsis) | qRT_ACT8_F1             | AGCACTTCCAGCAGATGTG           |
|                       | qRT_ACT8_R1             | GAAATGTGATCCCGTCATGG          |
|                       | qRT_BCM1_F2             | GAATGGGTTGACAGCGGATAAT        |
|                       | qRT_BCM1_R2             | GTGGCCTCCGATCTAATGTG          |
|                       | qRT_BCM2_F1             | CGTTTCAGGGTGCACTAGCT          |
|                       | qRT_BCM2_R1             | CCAGTGAGAGCGGCTGTAAT          |
|                       | qRT_CAO1_F1             | ACACCAACAGGTTCAATAT           |
|                       | qRT_CAO1_R1             | ACAGCAGAAGCAGTGGTTGA          |
|                       | qRT_GLK1_F1             | TGGCATCCAATGCATAACGG          |
|                       | qRT_GLK1_R1             | CGCTCTCTTTGACGGATGT           |
|                       | qRT_GLK2_F1             | AAACCTAAGGTGGATTGGAC          |
|                       | qRT_GLK2_R1             | TCTGAAGATGGCTAGCAACG          |
|                       | qRT_Lhca1_F1            | TTCTGCTCCTGGTGACTTT           |
|                       | qRT_Lhca1_R1            | AGCATAGCCCATCTACAGT           |
|                       | qRT_Lhcb1.1_F1          | GTACTTGGGTCCATTCTCTG          |
|                       | qRT_Lhcb1.1_R1          | GCCAAAAGCTCAGGGAAGA           |
|                       | qRT_NAP_F1              | CATGAGGTTAGATGAATGGGTACT      |
|                       | qRT_NAP_R1              | TCATCCTCCATTAGTACTTCGTCC      |
|                       | qRT_NYC1_F1             | TCTCTTCGGTTGCTGTTCAA          |
|                       | qRT_NYC1_R1             | CCAAAACCATGTTAGCACCA          |
|                       | qRT_ORE1_F1             | ACAGCTAAGAACGAATGGGT          |
|                       | qRT_ORE1_R1             | CCATTGCGTTAATGTGTGGA          |
|                       | qRT_PsaF_F1             | AAACGCAGGTTGCAACTA            |
|                       | qRT_PsaF_R1             | GGTCTCCGTTCACTATCAAG          |
|                       | qRT_SGR1_F1             | GATTGTTCCCGTTGCAAGGT          |
|                       | qRT_SGR1_R1             | AAGTCTTAGGGAGCGTTGAA          |
|                       | RT-qPCR (lettuce)       | qRT_LsACT7_F1                 |
| qRT_LsACT7_R1         |                         | CTTTTCCATGTCATCCAGTTGTC       |
| qRT_LsBCM_F1          |                         | CGACGAAGTGGTGAAGGTATCG        |
| qRT_LsBCM_R1          |                         | CAGCTAATGCACCCTGAAGTGC        |
| qRT_LsGLK_F1          |                         | TGGCATCATCATACCAGAGAG         |
| qRT_LsGLK_R1          |                         | GCTCTCCTGGATGGATGTAGG         |
| qRT_LsLhca1_F1        |                         | GATTTTGGGTTTGACCCACTT         |
| qRT_LsLhca1_R1        |                         | CATAGCCCATCTGCAGTGAAT         |
| qRT_LsSGR_F1          |                         | AGATCGAAGGCCAAATAATC          |
| qRT_LsSGR_R1          |                         | CAGGATGCTTCTCTCGTCAA          |
| ChIP-qPCR             | ChIP_ACT8_F1            | CAGGACTTGTTACGTTTTACGG        |
|                       | ChIP_ACT8_R1            | GGATTGACTGTGATAGGGTCG         |
|                       | ChIP_CAO_F1             | TGGACAACCAACCAGGAAAA          |
|                       | ChIP_CAO_R1             | ATCTGAGAATGCCTTCGGGAA         |
|                       | ChIP_BCM1-A_F1          | TCATACGTATCTTCAATAAGAGATTCC   |
|                       | ChIP_BCM1-A_R1          | CGAAAAACAGTAAAATTAACACTTTAAGC |
|                       | ChIP_BCM1-B_F1          | GCTTAAAGTGTTAATTTACTGTTTTTCG  |
|                       | ChIP_BCM1-B_R1          | GGGTAACCTGCCATCTCATAAAC       |
|                       | ChIP_BCM1-C_F1          | GTTTATGAGATGGCAGTTACCC        |
|                       | ChIP_BCM1-C_R1          | GTGCTTGCTTTTTGTTTTGG          |
|                       | ChIP_BCM1-D_F1          | CCAAACAAAAAGCACAAAGCAC        |
|                       | ChIP_BCM1-D_R1          | CGGAAACTCATAGATACTAGTTGAGG    |
|                       | ChIP_BCM1-E_F1          | CTCCAGTTTATACTATTGTCTGC       |
|                       | ChIP_BCM1-E_R1          | GAATCTGTCATCAACTGTGTCC        |
|                       | ChIP_Lhca1_F1           | TGCAGTGGATAAATGGCAAA          |
|                       | ChIP_Lhca1_R1           | GTGGACGAGAGGTTTTGGT           |
|                       | ChIP_Lhcb1.1_F1         | GCAAAAATCATTCTTGTACAGAGG      |
|                       | ChIP_Lhcb1.1_R1         | CTGGTTCGATAGTGTGGATTATATAGG   |
|                       | ChIP_Lhcb2.2_F1         | CACCACCACAACCATTACCA          |
|                       | ChIP_Lhcb2.2_R1         | CCAGATGCTTTGGGGAGTAG          |
